# Supplementary material for: Effectiveness of metal oxide catalysts for the degradation of 1,4-dioxane
Source: Royal Society of Chemistry journal article supplement (doi:10.1039/c9ra05007h), 2019-01-01
Supplement: c9ra05007h1.pdf [file c9ra05007h1.pdf]

**Supplementary Information for**

**Effectiveness of Metal Oxide Catalysts for the Dark Degradation of 1,4-Dioxane**

Kimberly N. Heck,<sup>1</sup> Yehong Wang,<sup>2</sup> Gang Wu,<sup>3</sup> Feng Wang,<sup>2</sup> Ah-lim Tsai,<sup>3</sup> David T. Adamson,<sup>4</sup>  
Michael S. Wong<sup>1,5,6,7,8\*</sup>

<sup>1</sup>Department of Chemical and Biomolecular Engineering, Rice University, Houston, TX, 77005, USA

<sup>2</sup>Dalian Institute of Chemical Physics, Chinese Academy of Sciences, Dalian, China

<sup>3</sup>Division of Hematology, Department of Internal Medicine, University of Texas-Medical School at Houston, Houston, TX, 77030, USA

<sup>4</sup>GSI Environmental, Houston, TX, 77098, USA

<sup>5</sup>Department of Chemistry, <sup>6</sup>Department of Civil and Environmental Engineering, <sup>7</sup>Department of Materials Science and NanoEngineering, <sup>8</sup>Center for Nano-Enabled Water Treatment, Rice University, Houston, TX, 77005, USA

**Table S1. Catalyst surface areas and amounts charged to reactor**

| <b>Catalyst</b>                   | <b>Surface Area (m<sup>2</sup> g<sup>-1</sup>)</b> | <b>Reactor Charge (g)</b> |
|-----------------------------------|----------------------------------------------------|---------------------------|
| CuO                               | 138                                                | 0.59                      |
| Fe <sub>2</sub> O <sub>3</sub>    | 146                                                | 0.55                      |
| TiO <sub>2</sub>                  | 65                                                 | 1.25                      |
| ZrO <sub>2</sub>                  | 70.42                                              | 1.15                      |
| CeO <sub>2</sub>                  | 45.36                                              | 1.79                      |
| WO <sub>3</sub>                   | 7.28                                               | 11.16                     |
| WO <sub>x</sub> /ZrO <sub>2</sub> | 275                                                | 0.30                      |
| H Zeolite Y                       | 775                                                | 0.10                      |
| SiO <sub>2</sub>                  | 447.8                                              | 0.18                      |
| Al <sub>2</sub> O <sub>3</sub>    | 149.8                                              | 0.54                      |

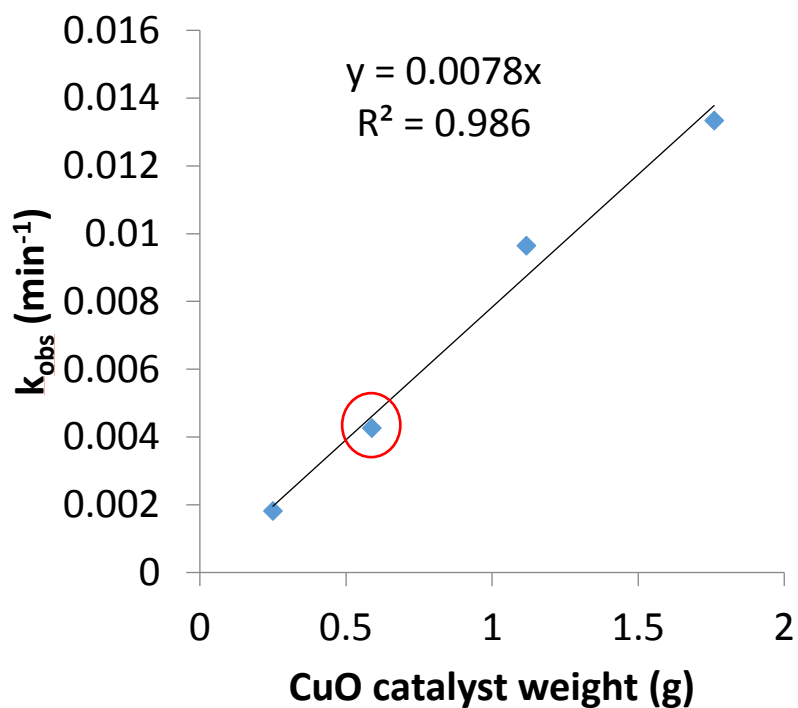

**Figure S1.** Determination of operating conditions to operate in kinetic regime (no mass transfer limitations) using CuO, one of the fastest catalysts for H<sub>2</sub>O<sub>2</sub> degradation, shows a linear increase in the measured first order rate constant with added catalyst. The circled point corresponds to the SSA chosen for all other reactions.

**Table S2. Weisz-Prater criterion of catalysts for H<sub>2</sub>O<sub>2</sub> and 1,4-dioxane degradation**

| Catalyst                                 | Amount added to reactor (g) | Solid density, $\rho_c$ (kg m <sup>-3</sup> ) | $k'_{H_2O_2}$ (m <sup>3</sup> h <sup>-1</sup> kg <sup>-1</sup> ) | $k'_{diox}$ (m <sup>3</sup> h <sup>-1</sup> kg <sup>-1</sup> ) | $C_{WP}$ (H <sub>2</sub> O <sub>2</sub> ) <sup>a</sup> | $C_{WP}$ (1,4-dioxane) <sup>a</sup> |
|------------------------------------------|-----------------------------|-----------------------------------------------|------------------------------------------------------------------|----------------------------------------------------------------|--------------------------------------------------------|-------------------------------------|
| Fe <sub>2</sub> O <sub>3</sub>           | 0.56                        | 3.4 x 10 <sup>-6</sup>                        | 6882                                                             | 0                                                              | 4.5 x 10 <sup>-3</sup>                                 | 0                                   |
| CuO                                      | 0.59                        | 3.25 x 10 <sup>-6</sup>                       | 441                                                              | 374                                                            | 3.0 x 10 <sup>-4</sup>                                 | 2.1 x 10 <sup>-2</sup>              |
| CeO <sub>2</sub>                         | 1.79                        | 1.1 x 10 <sup>-6</sup>                        | 1116                                                             | 0                                                              | 2.3 x 10 <sup>-3</sup>                                 | 0                                   |
| SiO <sub>2</sub>                         | 0.18                        | 1.1 x 10 <sup>-6</sup>                        | 8.81                                                             | 105                                                            | 1.9 x 10 <sup>-6</sup>                                 | 1.8 x 10 <sup>-3</sup>              |
| Al <sub>2</sub> O <sub>3</sub>           | 0.54                        | 3.2 x 10 <sup>-6</sup>                        | 60                                                               | 37                                                             | 3.9 x 10 <sup>-5</sup>                                 | 1.9 x 10 <sup>-3</sup>              |
| H <sup>+</sup> -Zeolite Y                | 0.10                        | 6.1 x 10 <sup>-7</sup>                        | 0                                                                | 0                                                              | 0                                                      | 0                                   |
| TiO <sub>2</sub>                         | 1.25                        | 7.3 x 10 <sup>-6</sup>                        | 46.4                                                             | 62.4                                                           | 6.8 x 10 <sup>-5</sup>                                 | 7.6 x 10 <sup>-3</sup>              |
| ZrO <sub>2</sub>                         | 1.15                        | 6.7 x 10 <sup>-6</sup>                        | 1109                                                             | 0.1                                                            | 1.5 x 10 <sup>-3</sup>                                 | 9.8 x 10 <sup>-3</sup>              |
| WO <sub>3</sub>                          | 11.1                        | 6.5 x 10 <sup>-5</sup>                        | 0.51                                                             | 0.098                                                          | 6.7 x 10 <sup>-6</sup>                                 | 1.1 x 10 <sup>-4</sup>              |
| 20 wt% WO <sub>x</sub> /ZrO <sub>2</sub> | 0.30                        | 1.7 x 10 <sup>-6</sup>                        | 2132                                                             | 1252                                                           | 7.3 x 10 <sup>-4</sup>                                 | 3.6 x 10 <sup>-2</sup>              |

<sup>a</sup>Calculated assuming a conservative pellet radius of 1 mm

**Table S3. Comparison of  $k_{H2O2}$  with literature values**

| <b>Material</b>                          | <b>This Work</b>                                |                                                    | <b>From Ref<sup>1</sup></b>                     |                                                    | <b>From Ref<sup>2-4</sup></b>                   |                                                    |
|------------------------------------------|-------------------------------------------------|----------------------------------------------------|-------------------------------------------------|----------------------------------------------------|-------------------------------------------------|----------------------------------------------------|
|                                          | $C_{cat}$ (mcat <sup>2</sup> mL <sup>-1</sup> ) | $k_{H2O2}$ (L mcat <sup>-2</sup> s <sup>-1</sup> ) | $C_{cat}$ (mcat <sup>2</sup> mL <sup>-1</sup> ) | $k_{H2O2}$ (L mcat <sup>-2</sup> s <sup>-1</sup> ) | $C_{cat}$ (mcat <sup>2</sup> mL <sup>-1</sup> ) | $k_{H2O2}$ (L mcat <sup>-2</sup> s <sup>-1</sup> ) |
| SiO <sub>2</sub>                         | 0.475                                           | 5.97E-10                                           | 1.32                                            | 1.81E-09                                           | -                                               | -                                                  |
| Al <sub>2</sub> O <sub>3</sub>           | 0.475                                           | 1.54E-09                                           | 13.48                                           | 3.72E-09                                           | -                                               | -                                                  |
| TiO <sub>2</sub>                         | 0.475                                           | 1.58E-08                                           | 0.42                                            | 9.32E-07                                           | -                                               | -                                                  |
| ZrO <sub>2</sub>                         | 0.475                                           | 7.08E-07                                           | 0.27                                            | 4.92E-06                                           | 0.15                                            | 4.10E-07                                           |
| CeO <sub>2</sub>                         | 0.475                                           | 1.02E-06                                           | 1.20                                            | 5.27E-07                                           | 0.15                                            | 1.13E-06                                           |
| Fe <sub>2</sub> O <sub>3</sub>           | 0.475                                           | 2.80E-06                                           | -                                               | -                                                  | 0.09                                            | 2.33E-06                                           |
| CuO                                      | 0.475                                           | 1.66E-07                                           | -                                               | -                                                  | 0.006                                           | 3.17E-05                                           |
| H <sup>+</sup> - Zeolite Y               | 0.475                                           | 9.00E-10                                           | -                                               | -                                                  | -                                               | -                                                  |
| WO <sub>3</sub>                          | 0.475                                           | 2.25E-11                                           | -                                               | -                                                  | -                                               | -                                                  |
| 20 wt% WO <sub>x</sub> /ZrO <sub>2</sub> | 0.475                                           | 4.59E-07                                           | -                                               | -                                                  | -                                               | -                                                  |

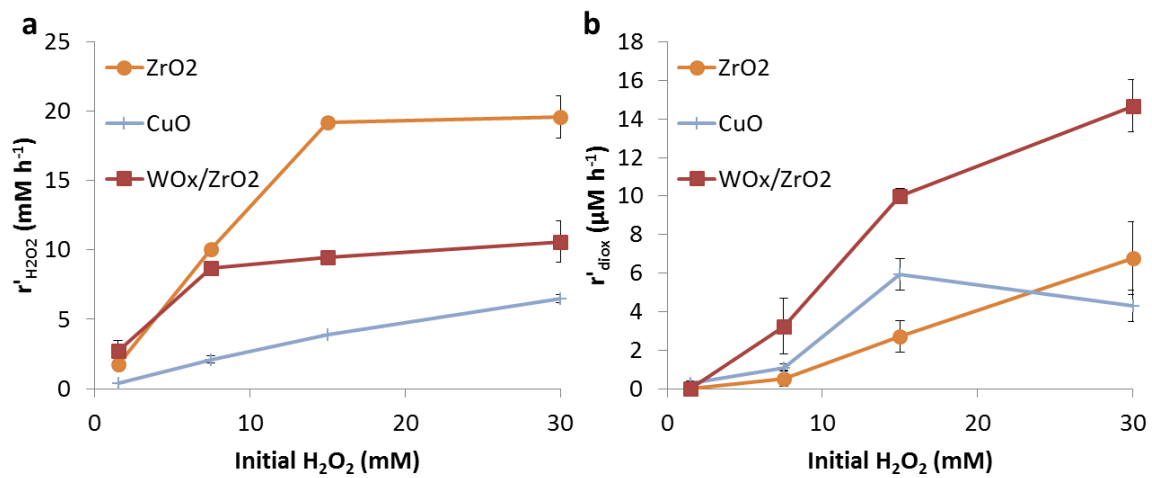

**Figure S2.** Effect of initial H<sub>2</sub>O<sub>2</sub> on (a)  $r'_{H_2O_2}$ , and (b)  $r'_{diox}$ . [1,4-dioxane]<sub>0</sub> = 27 μM

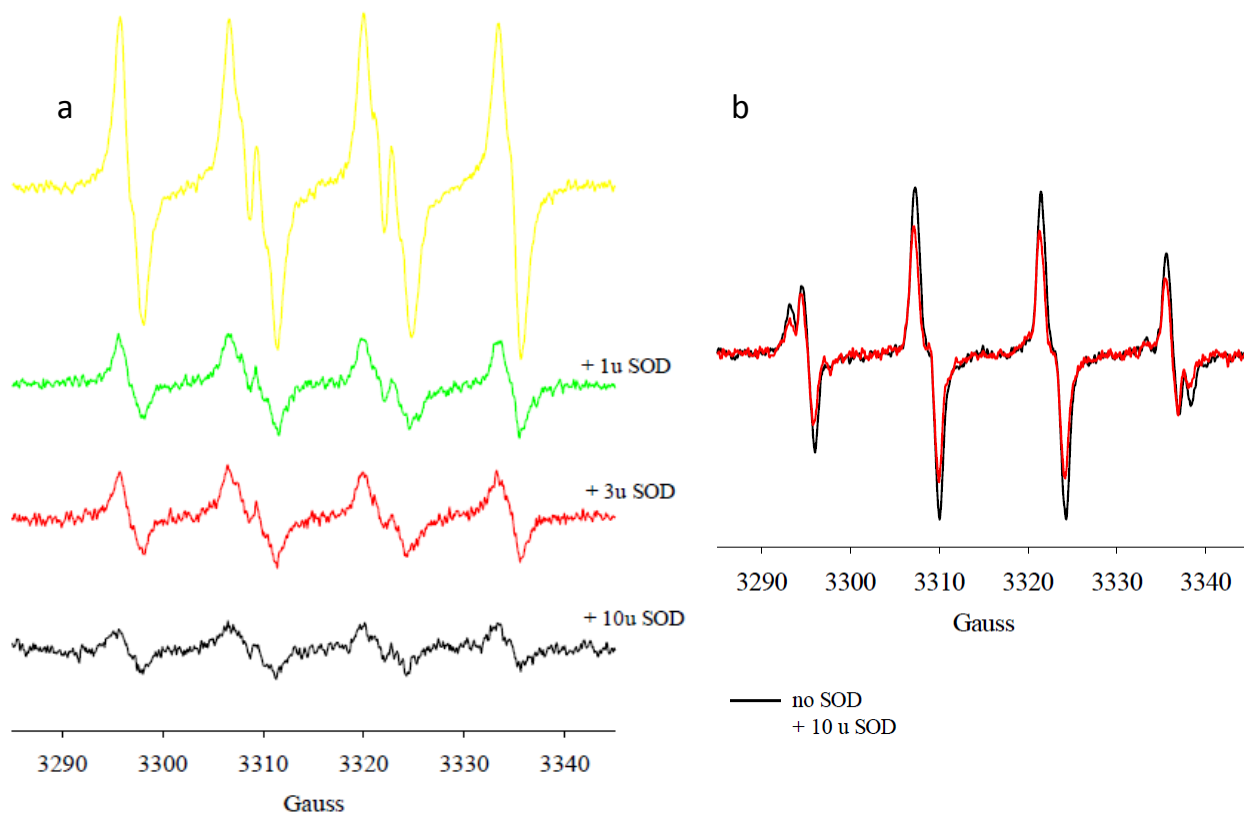

**Figure S3.** EPR signals for H<sub>2</sub>O<sub>2</sub>, BMPO and 20 wt% WO<sub>x</sub>/ZrO<sub>2</sub> (a) or CuO (b) in the presence of SOD.

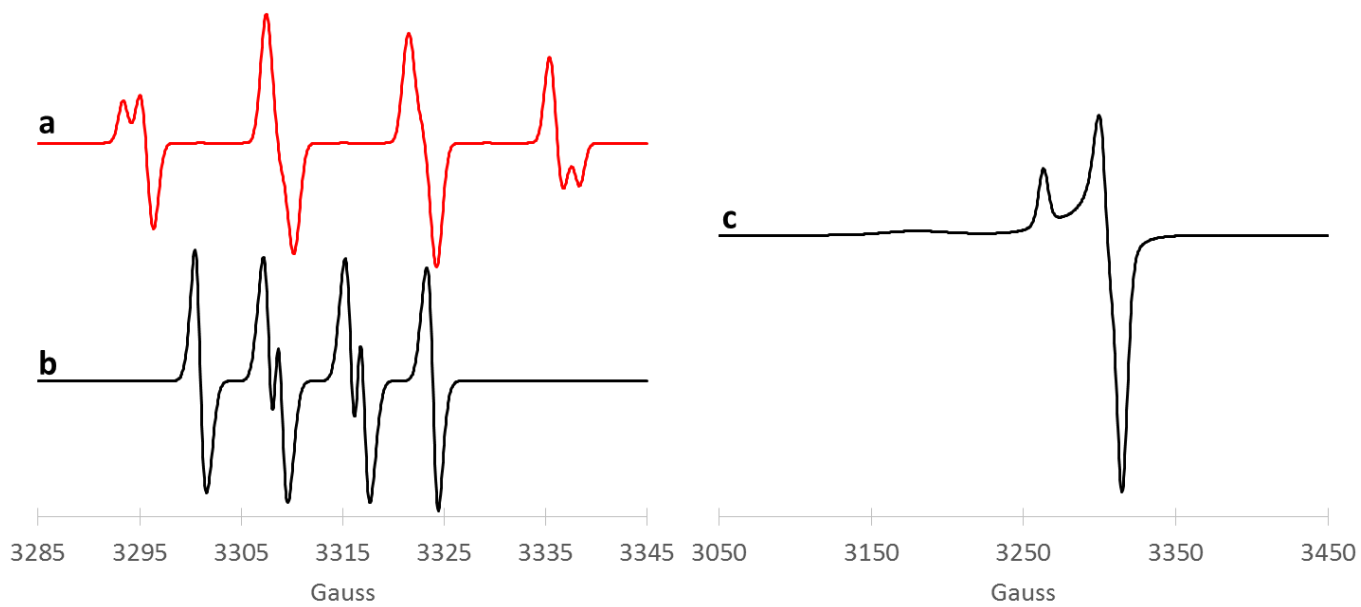

**Figure S4.** Simulated EPR spectra of (a) BMPO/ $\bullet$ OH, (b) BMPO/ $\bullet$ O<sub>2</sub><sup>-</sup>, and (c) combined spectra of free and surface bound  $\bullet$ O<sub>2</sub><sup>-</sup> (or a superoxide and a peroxy radical).



**Table S4. Oxidation Potentials of selected oxidants at pH 7**

| Oxidant                       | E <sup>0</sup> (V) |
|-------------------------------|--------------------|
| •OH                           | 2.31 <sup>a</sup>  |
| H <sub>2</sub> O <sub>2</sub> | 1.77 <sup>b</sup>  |
| O <sub>2</sub> • <sup>-</sup> | 1.06 <sup>a</sup>  |

<sup>a</sup>From reference<sup>5</sup>

<sup>b</sup>From reference<sup>6</sup>

**Table S5.** Lewis acid site densities of catalytic materials.

| <b>Catalyst</b>                   | <b>Concentration of Lewis acid sites (mmol g<sub>cat</sub><sup>-1</sup>)</b> | <b>Lewis acid site density (atoms nm<sup>-2</sup>)</b> | <b>Surface metal sites that are Lewis acid sites<sup>a</sup></b> |
|-----------------------------------|------------------------------------------------------------------------------|--------------------------------------------------------|------------------------------------------------------------------|
| CuO                               | 0.160                                                                        | 0.69                                                   | 17.2%                                                            |
| ZrO <sub>2</sub>                  | 0.092                                                                        | 0.79                                                   | 19.7%                                                            |
| WO <sub>x</sub> /ZrO <sub>2</sub> | 0.260                                                                        | 0.58                                                   | 14.4%                                                            |

<sup>a</sup> Calculated assuming surface density of 4 atoms nm<sup>-2</sup>, from ref<sup>7,8</sup>

## SI References

- 1 Hiroki, A. & LaVerne, J. A. Decomposition of Hydrogen Peroxide at Water–Ceramic Oxide Interfaces. *The Journal of Physical Chemistry B* **109**, 3364-3370, doi:10.1021/jp046405d (2005).
- 2 Lousada, C. M., Yang, M., Nilsson, K. & Jonsson, M. Catalytic decomposition of hydrogen peroxide on transition metal and lanthanide oxides. *Journal of Molecular Catalysis A: Chemical* **379**, 178-184, doi:<http://dx.doi.org/10.1016/j.molcata.2013.08.017> (2013).
- 3 Lousada, C. M. & Jonsson, M. Kinetics, Mechanism, and Activation Energy of H<sub>2</sub>O<sub>2</sub> Decomposition on the Surface of ZrO<sub>2</sub>. *The Journal of Physical Chemistry C* **114**, 11202-11208, doi:10.1021/jp1028933 (2010).
- 4 Lousada, C. M., Johansson, A. J., Brinck, T. & Jonsson, M. Mechanism of H<sub>2</sub>O<sub>2</sub> Decomposition on Transition Metal Oxide Surfaces. *The Journal of Physical Chemistry C* **116**, 9533-9543, doi:10.1021/jp300255h (2012).
- 5 Buettner, G. R. The Pecking Order of Free Radicals and Antioxidants: Lipid Peroxidation,  $\alpha$ -Tocopherol, and Ascorbate. *Archives of Biochemistry and Biophysics* **300**, 535-543, doi:<http://dx.doi.org/10.1006/abbi.1993.1074> (1993).
- 6 Bockris, J. O. M. & Oldfield, L. F. The oxidation-reduction reactions of hydrogen peroxide at inert metal electrodes and mercury cathodes. *Transactions of the Faraday Society* **51**, 249-259, doi:10.1039/TF9555100249 (1955).
- 7 Kim, T., Burrows, A., Kiely, C. J. & Wachs, I. E. Molecular/electronic structure–surface acidity relationships of model-supported tungsten oxide catalysts. *Journal of Catalysis* **246**, 370-381 (2007).
- 8 Wachs, I. E. Raman and IR studies of surface metal oxide species on oxide supports: Supported metal oxide catalysts. *Catalysis Today* **27**, 437-455, doi:[http://dx.doi.org/10.1016/0920-5861\(95\)00203-0](http://dx.doi.org/10.1016/0920-5861(95)00203-0) (1996).
